# Supplementary material for: Health-Related Quality of Life in Metastatic Colorectal Cancer Patients Treated with Curative Resection and/or Local Ablative Therapy or Systemic Therapy in the Finnish RAXO-Study
Source: MDPI journal article supplement (doi:10.3390/cancers14071713), 2022-03-28
Supplement: s1 [file s1]

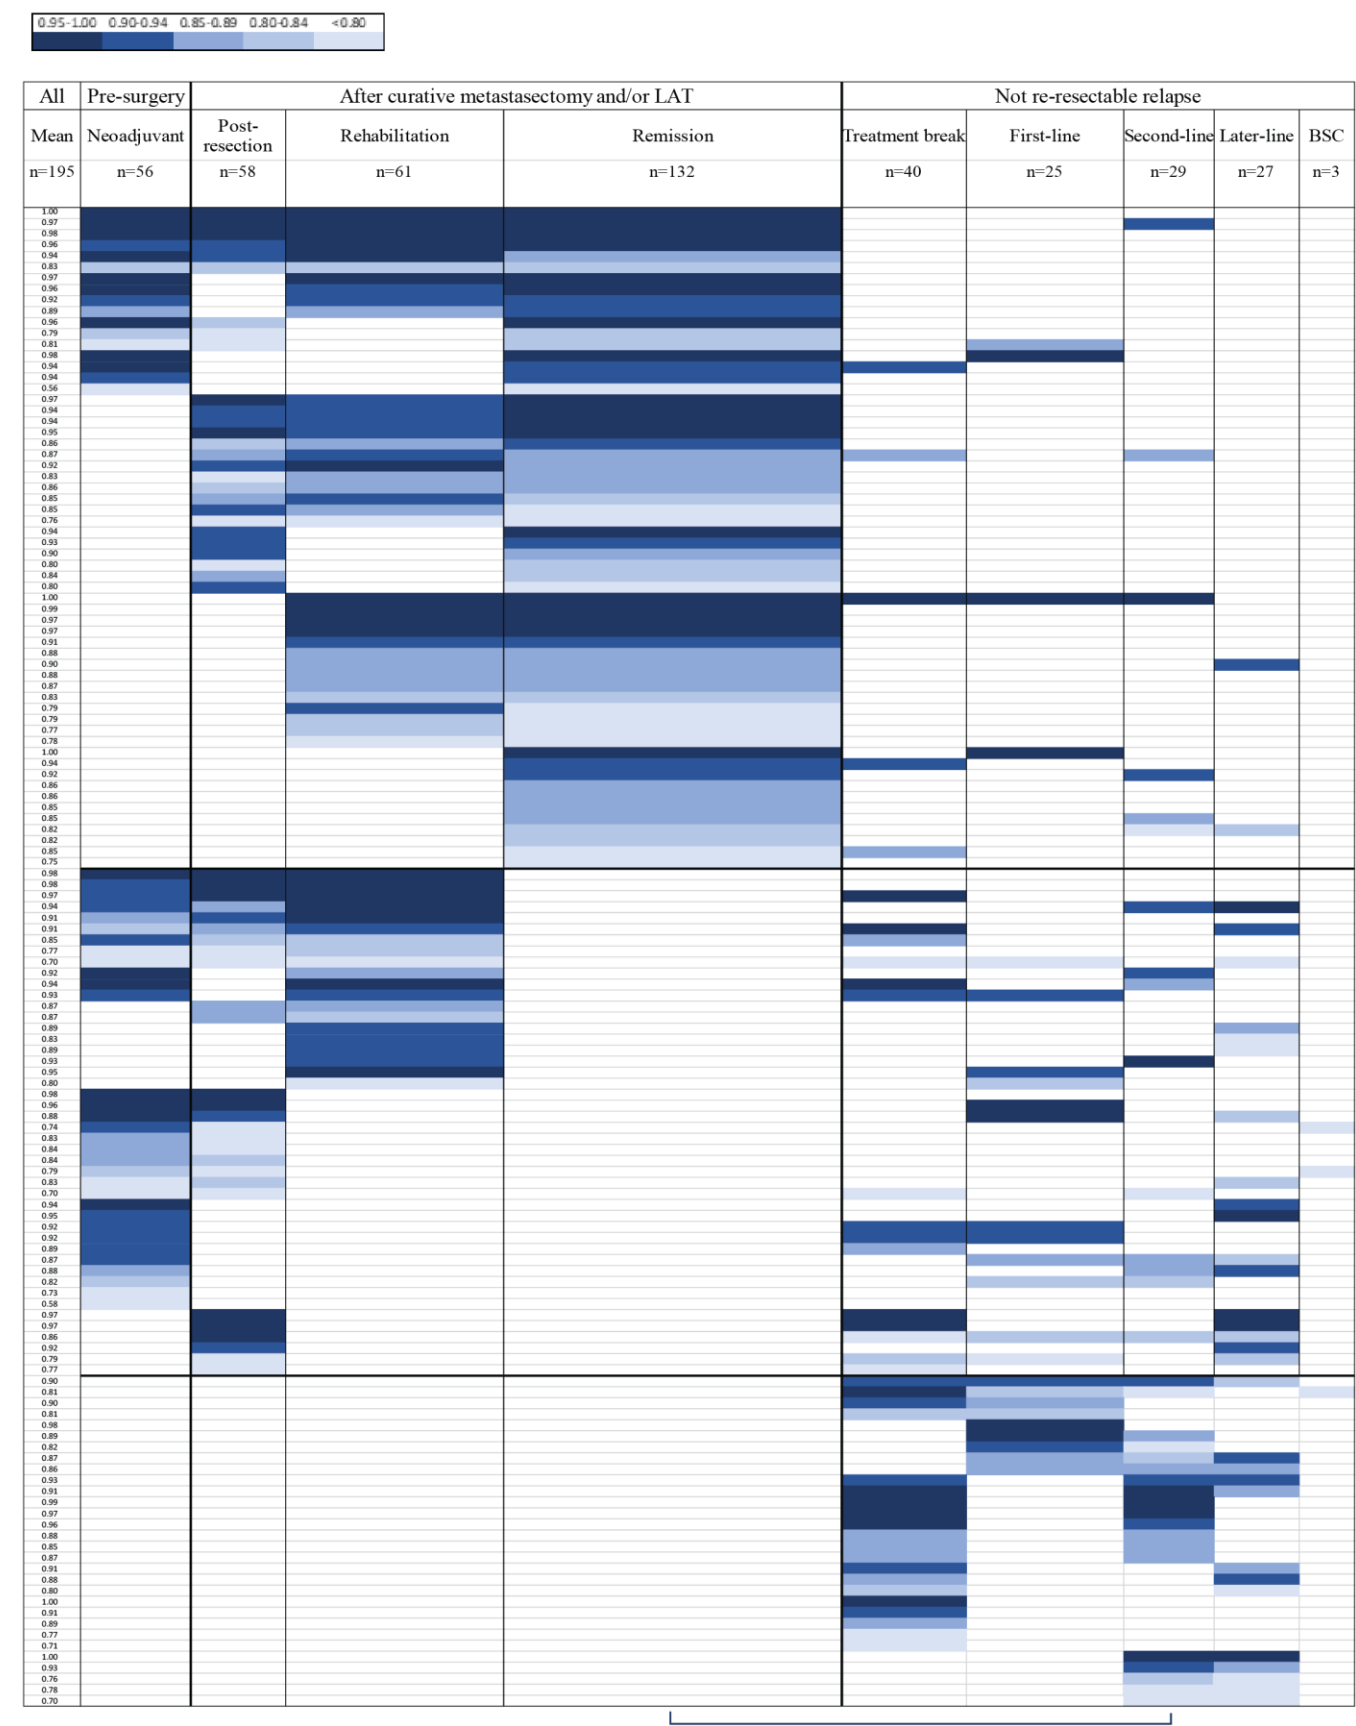

**Figure S1.** Flowchart of individual patients that had metastasectomy/LAT and answered multiple questionnaires (n=195) during curative treatment phases and/or non-curative treatment phases (i.e., after not re-resectable relapse). Each horizontal line represents an individual with heatmap for 15D index score (if empty patient did not answer during that treatment phase) and first column denotes mean score of the individual's all questionnaires. Statistically significant differences between treatment phases are marked with brackets. Abbreviations: LAT = Local Ablative Therapy, BSC = Best Supportive Care.

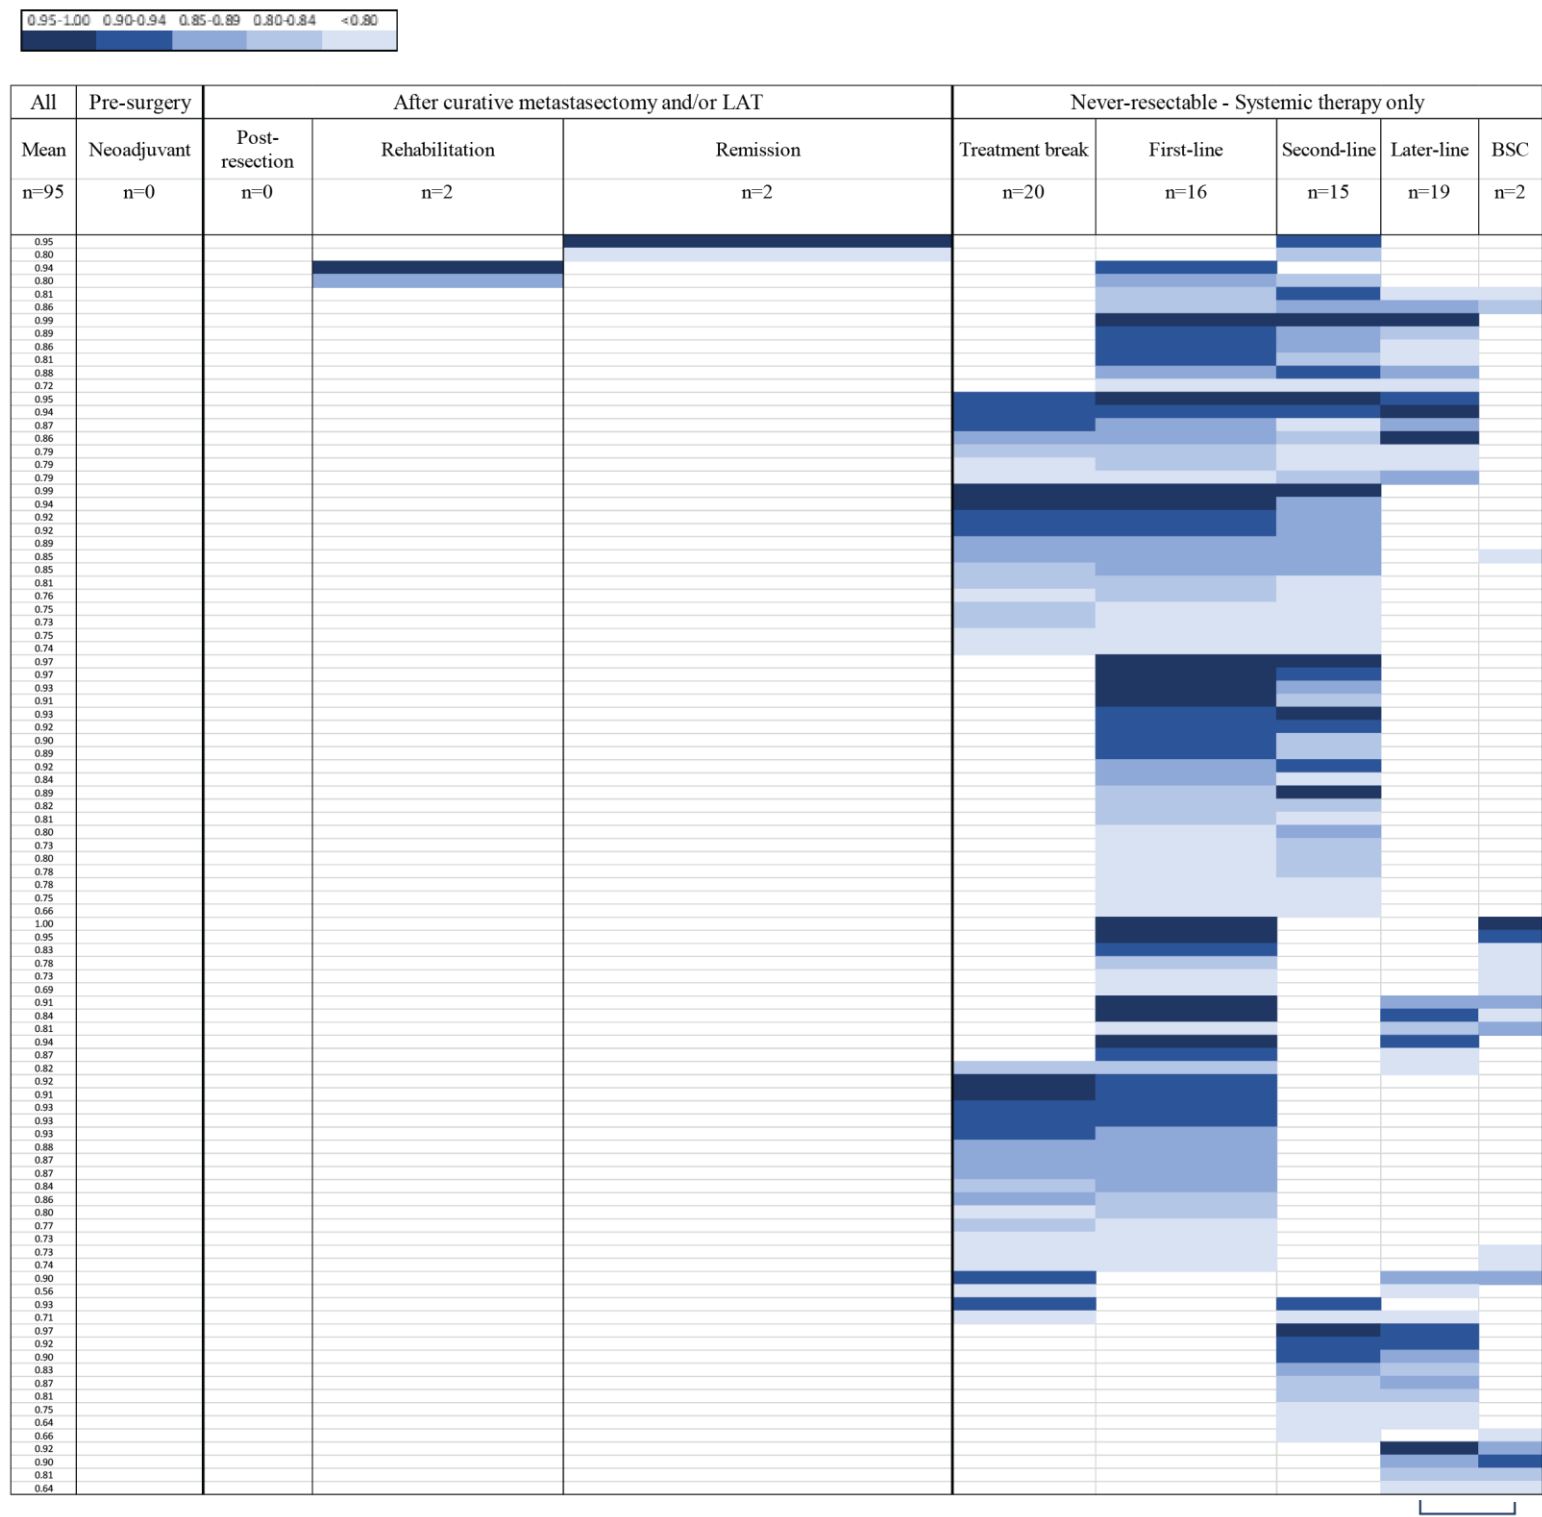

**Figure S2.** Flowchart of individual patients that had systemic therapy only and answered multiple questionnaires (n=95) during curative treatment phases (n = 4) and/or non-curative treatment phases (never-resectable). Each horizontal line represents an individual with heatmap for 15D index score (if empty patient did not answer during that treatment phase) and first column denotes mean score of the individual's all questionnaires. Statistically significant differences between treatment phases are marked with brackets. Abbreviations: LAT = Local Ablative Therapy, BSC = Best Supportive Care.

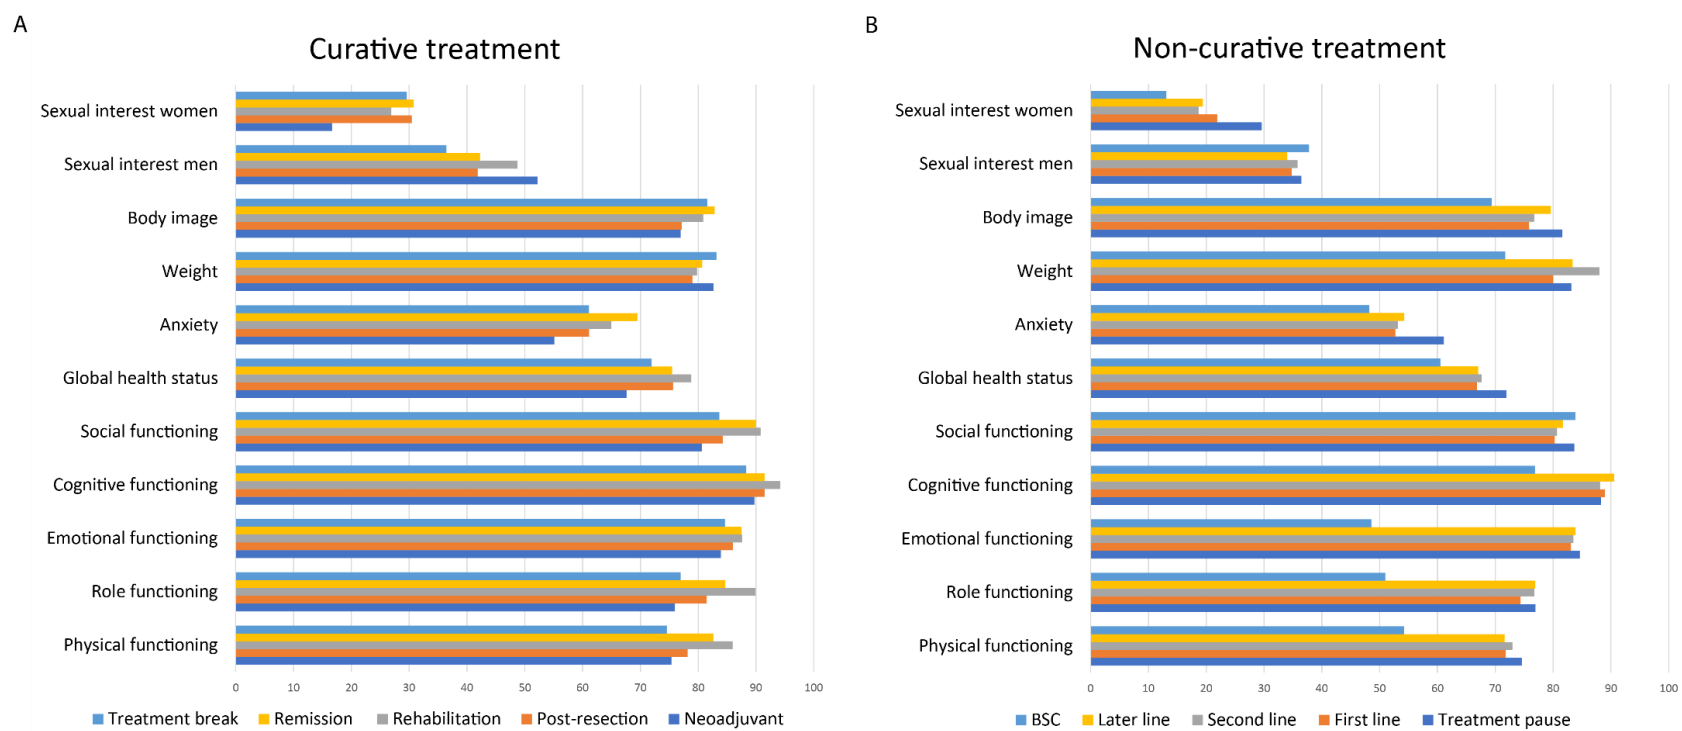

**Figure S3.** The mean health-related quality of life measured with QLQ-C30 and QLQ-CR29 functioning profile scales during curative intent treatment (A) and during non-curative treatment (B). Abbreviations: BSC = Best Supportive Care.

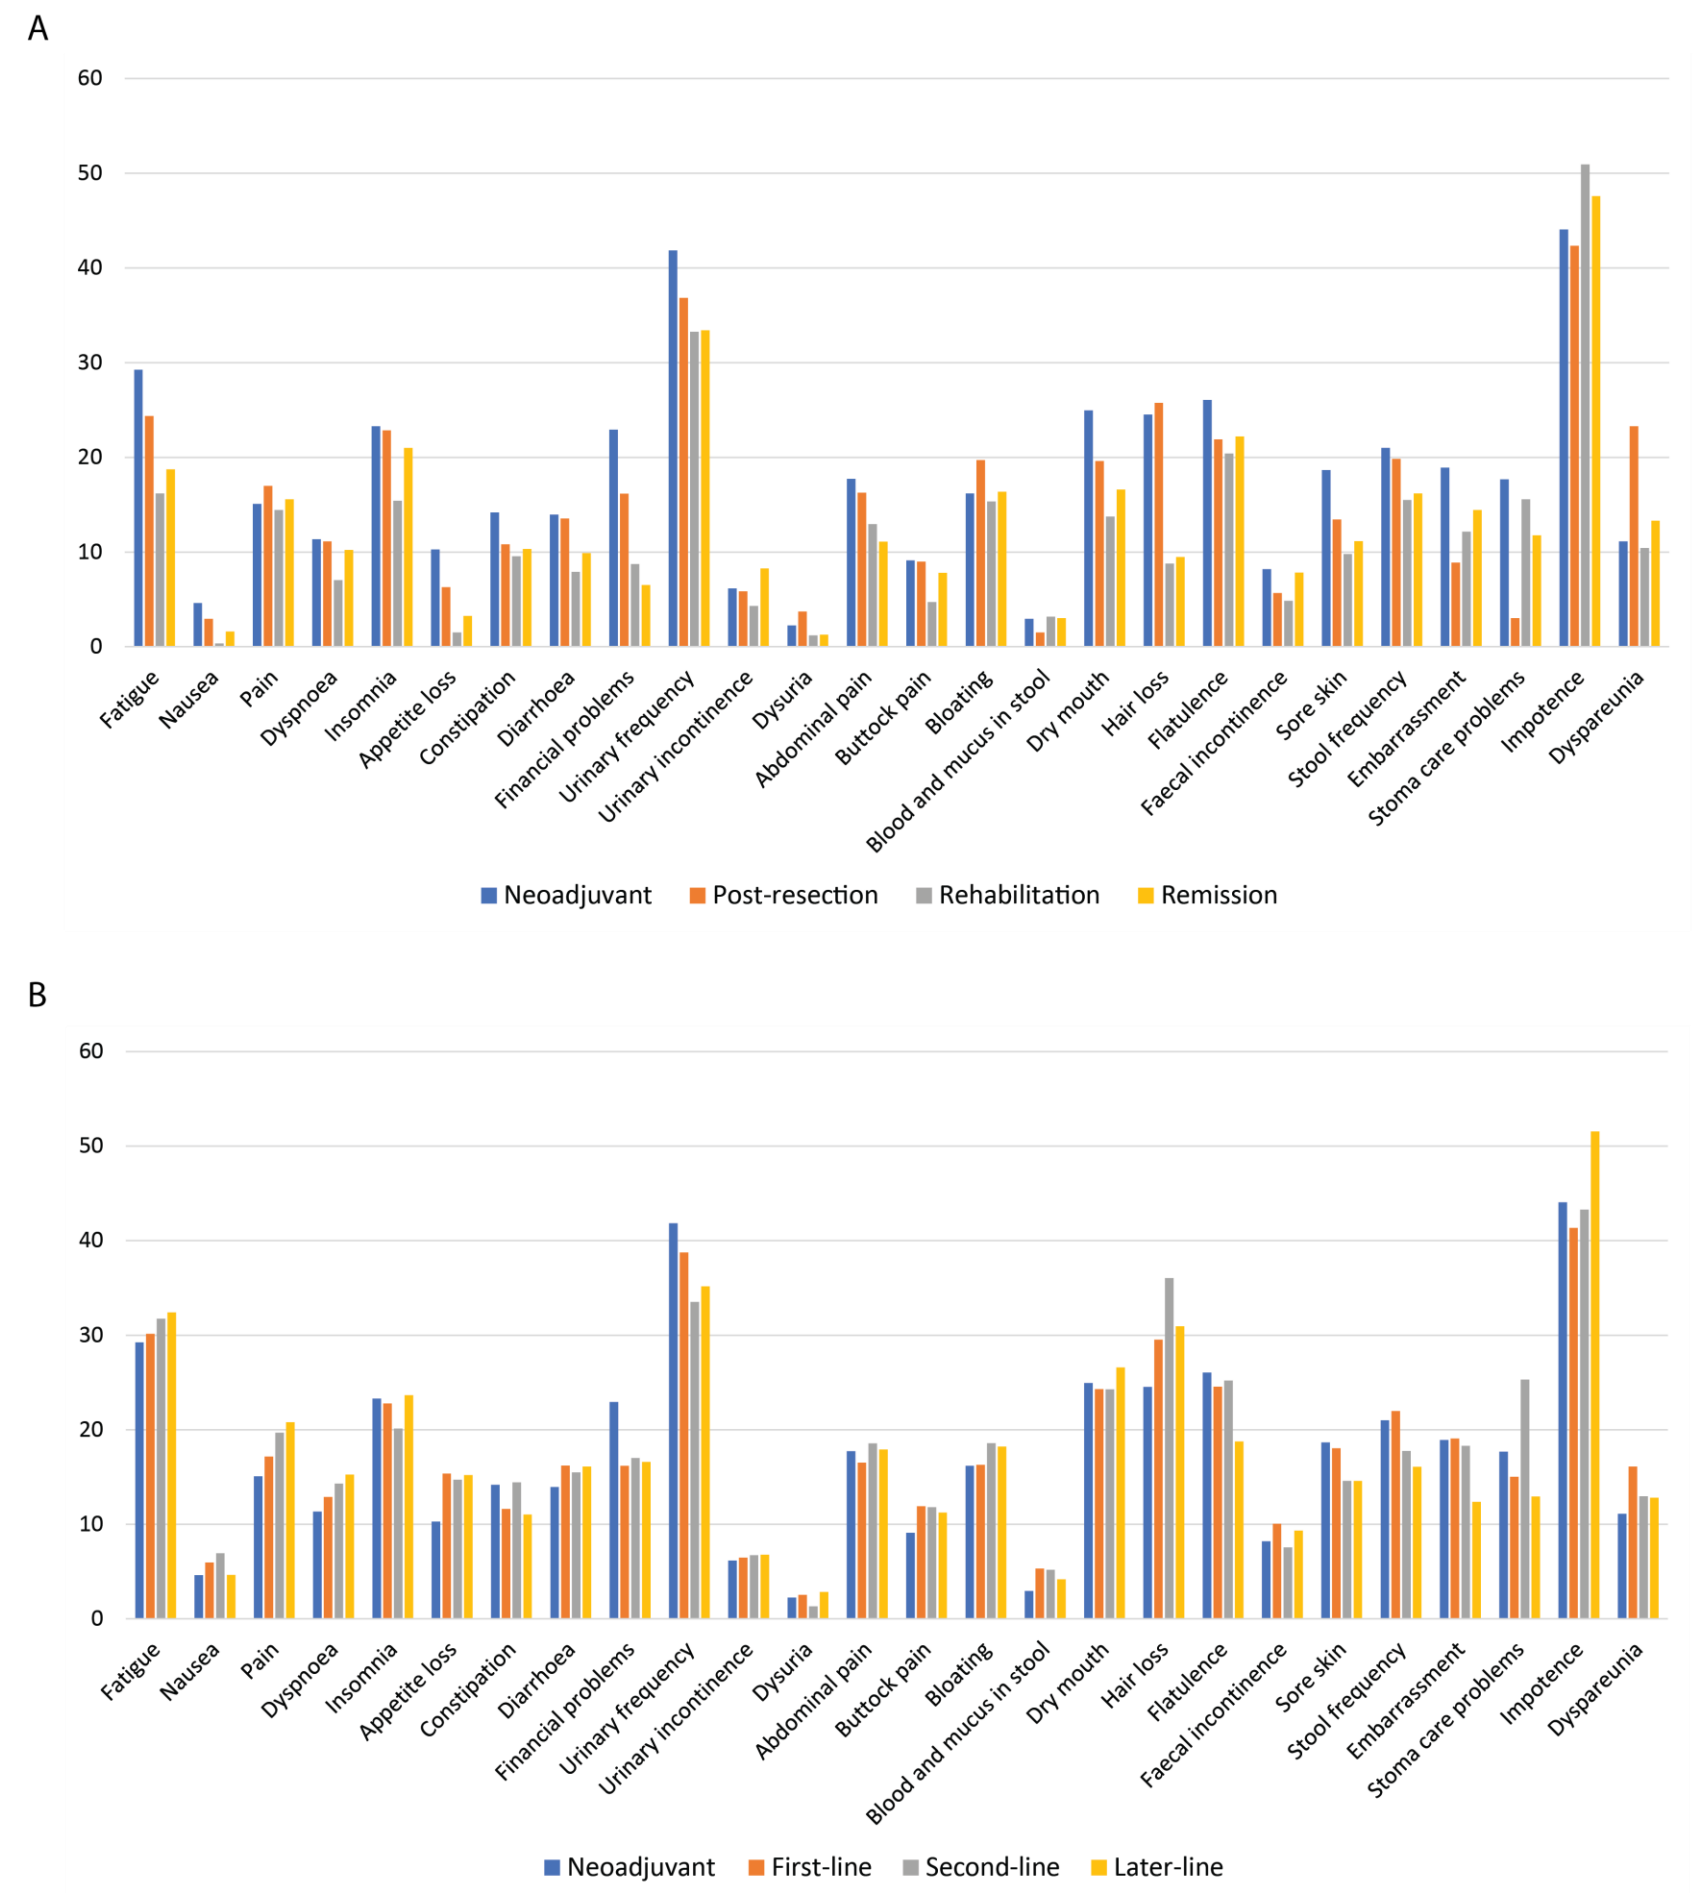

**Figure S4.** The mean health-related quality of life measured with QLQ-C30 and QLQ-CR29 symptom profile scales before and after metastasectomy (panel A) and in systemic treatments (panel B).

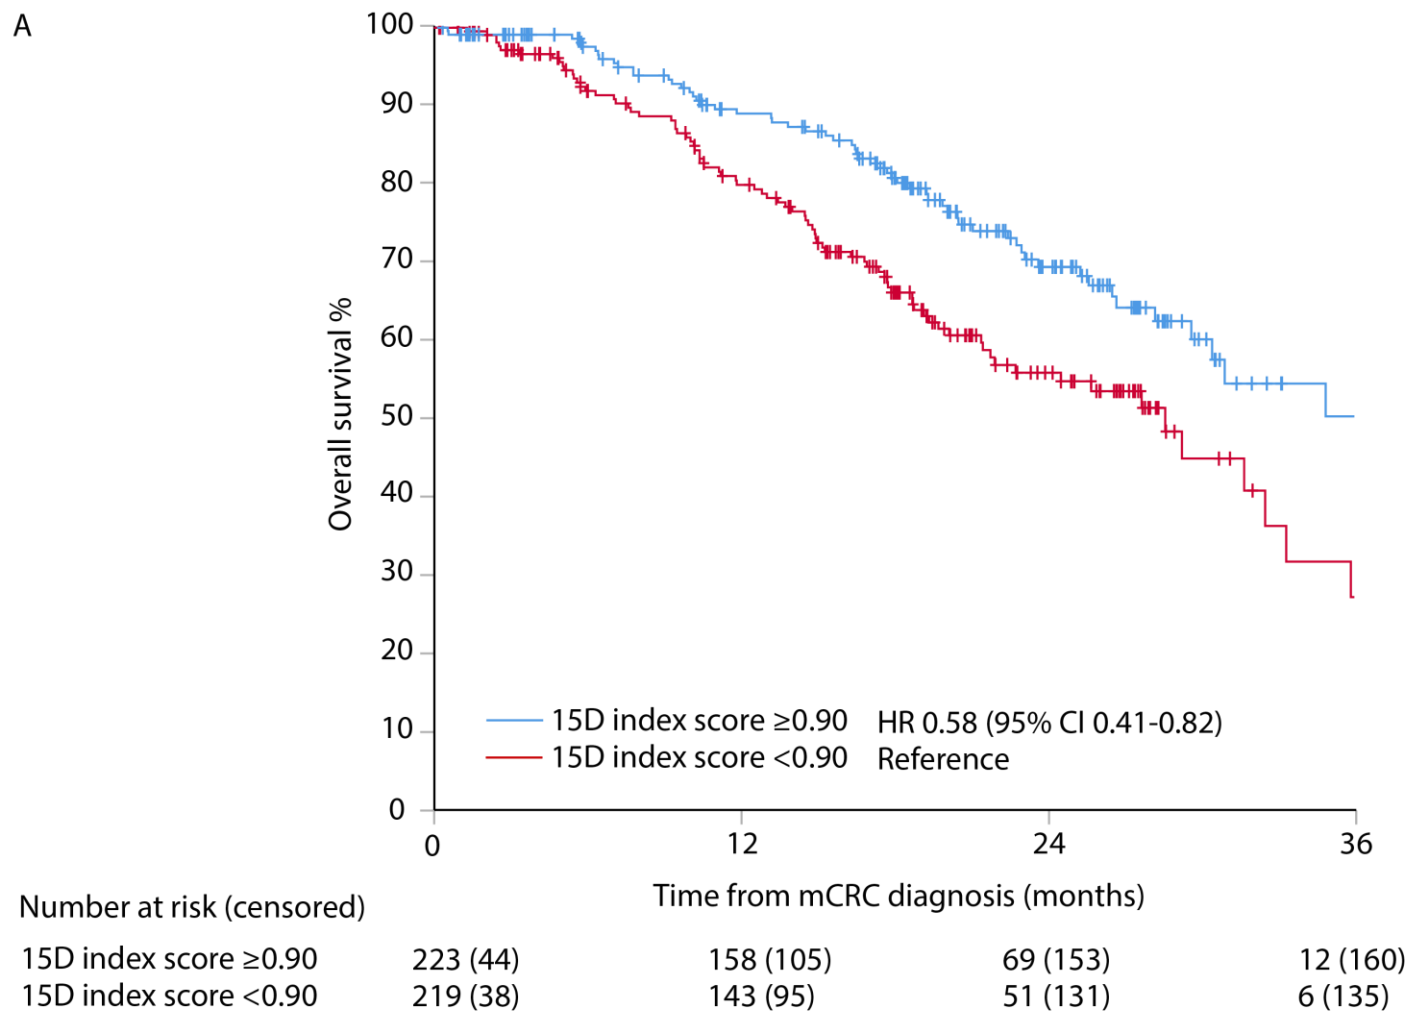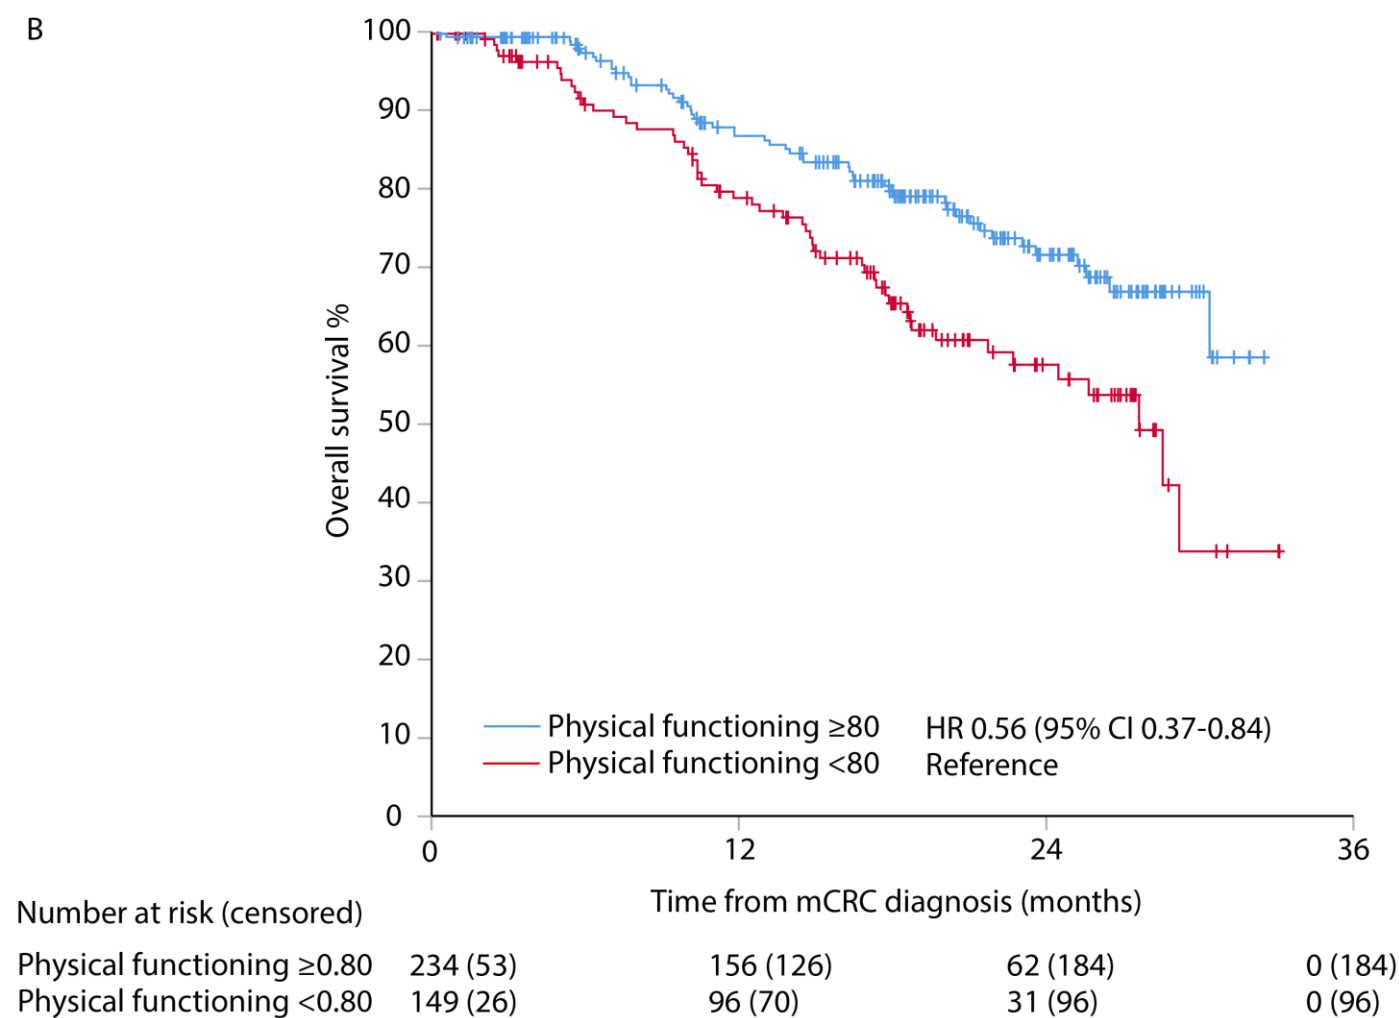

**Figure S5.** Overall survival (OS) from first cross-sectional QoL questionnaire divided by above median ( $\geq 0.90$ ) or below median ( $< 0.90$ ) with 15D generic index score or above median ( $\geq 80$ ) or below median ( $< 80$ ) for QLQ-C30 physical function; adjusted hazard ratio (HR) and 95% confidence interval (95% CI) presented. Abbreviations: mCRC = Metastatic Colorectal Cancer.

**Table S1.** Number of patients and questionnaires in the different treatment phases. At most centres, questionnaires were sent out twice a year by mail to all consenting patients still alive

|                                 | Treatment      | Patients      |                                    |                                              | Questionnaires |
|---------------------------------|----------------|---------------|------------------------------------|----------------------------------------------|----------------|
|                                 |                | All<br>n=444* | Metastasectomy<br>n=247*           | Systemic therapy<br>n=197*                   |                |
| Curative ¥<br>n=138+62+4        | Neoadjuvant    | 54            | 54                                 | -                                            | 77             |
|                                 | Post-resection | 58            | 58                                 | -                                            | 82             |
|                                 | Rehabilitation | 61            | 59                                 | 2                                            | 109            |
|                                 | Remission      | 132           | 130                                | 2                                            | 366            |
|                                 |                |               | Not re-resectable<br>relapse n=109 | Long-term remission<br>with systemic therapy |                |
| Non-curative ¢<br>n=62+47+4+193 | Treatment      | 87            | 40                                 | 47                                           | 200            |
|                                 | First-line     | 169           | 28                                 | 141                                          | 470            |
|                                 | Second-line    | 115           | 40                                 | 75                                           | 209            |
|                                 | Later-line     | 106           | 54                                 | 52                                           | 194            |
|                                 | BSC            | 35            | 10                                 | 25                                           | 44             |

\* 188 (42%) patients answered one questionnaire and 256 (58%) patients answered multiple (2-13) questionnaires during the treatment phases. If multiple questionnaires were answered during one phase the mean value for that patient was used.

‡ Some patients have multiple answers during one treatment phase

¥ Curative: patients rendered tumour free with systemic therapy n=2 or metastasectomy/LAT n= 200 (of which 138 have answered questionnaires only in curative phase and 62 in curative phase and then later in noncurative phase, as not re-resectable at relapse)

¢ Non-curative: relapse after metastasectomy/LAT that was not re-resectable and treated with systemic therapy n=62+47, or systemic therapy only n=193+4

Abbreviations: LAT = Local Ablative Therapy, BSC = Best Supportive Care.

Table S2. Patient demographics for patients included in HRQoL-substudy and patients invited but not responding (did not return questionnaires).

|                               |                                  | Metastasectomy/LAT         |             |                            |             | Systemic therapy only      |             |                            |             |
|-------------------------------|----------------------------------|----------------------------|-------------|----------------------------|-------------|----------------------------|-------------|----------------------------|-------------|
|                               |                                  | Included in HRQoL-substudy |             | Invited but not responding |             | Included in HRQoL-substudy |             | Invited but not responding |             |
|                               |                                  | 247                        | 96 %        | 9                          | 4 %         | 197                        | 89 %        | 25                         | 11 %        |
| Age                           | Median (range)                   | 64.3                       | (25.0-81.5) | 76.6                       | (57.6-77.9) | 66.2                       | (24.3-87.9) | 67.2                       | (39.1-84.9) |
|                               | ≤70                              | 189                        | 77 %*       | 2                          | 22 %        | 133                        | 68 %        | 17                         | 68 %        |
|                               | >70                              | 58                         | 24 %        | 7                          | 78 %*       | 64                         | 33 %        | 8                          | 32 %        |
| Sex                           | Male                             | 142                        | 58 %        | 7                          | 78 %        | 116                        | 59 %        | 17                         | 68 %        |
|                               | Female                           | 105                        | 43 %        | 2                          | 22 %        | 81                         | 41 %        | 8                          | 32 %        |
| ECOG                          | PS 0                             | 115                        | 47 %*       | 1                          | 11 %        | 57                         | 29 %*       | 2                          | 8 %         |
|                               | PS 1                             | 120                        | 49 %        | 6                          | 67 %        | 115                        | 58 %        | 15                         | 60 %        |
|                               | PS 2-3                           | 12                         | 5 %         | 2                          | 22 %*       | 25                         | 13 %        | 8                          | 32 %*       |
| Charlson comorbidity index    | 0                                | 204                        | 83 %        | 8                          | 89 %        | 156                        | 79 %        | 17                         | 68 %        |
|                               | 1 to 2                           | 42                         | 17 %        | 1                          | 11 %        | 40                         | 20 %        | 7                          | 28 %        |
|                               | 3 to 5                           | 1                          | 0 %         | 0                          | 0 %         | 1                          | 1 %         | 1                          | 4 %         |
| Smoking status                | Never or former smoker           | 159                        | 87 %        | 6                          | 86 %        | 125                        | 83 %        | 19                         | 91 %        |
|                               | Current smoker                   | 23                         | 13 %        | 1                          | 14 %        | 25                         | 17 %        | 2                          | 10 %        |
| BMI                           | ≥20                              | 227                        | 92 %*       | 6                          | 67 %        | 185                        | 94 %        | 23                         | 92 %        |
|                               | <20                              | 20                         | 8 %         | 3                          | 33 %*       | 12                         | 6 %         | 2                          | 8 %         |
| Presentation of metastases    | Synchronous                      | 155                        | 63 %        | 5                          | 56 %        | 143                        | 73 %        | 19                         | 76 %        |
|                               | Early metachronous§              | 21                         | 9 %         | 1                          | 11 %        | 17                         | 9 %         | 1                          | 4 %         |
|                               | Late metachronous                | 71                         | 29 %        | 3                          | 33 %        | 37                         | 19 %        | 5                          | 20 %        |
| Primary location              | Right colon                      | 50                         | 20 %        | 2                          | 22 %        | 59                         | 30 %        | 10                         | 40 %        |
|                               | Left colon                       | 116                        | 47 %        | 2                          | 22 %        | 65                         | 33 %        | 4                          | 16 %        |
|                               | Rectum                           | 81                         | 33 %        | 5                          | 56 %        | 72                         | 37 %        | 10                         | 40 %        |
|                               | Multiple                         | 0                          | 0 %         | 0                          | 0 %         | 1                          | 1 %         | 1                          | 4 %         |
| Surgery primary tumour        | Operated upfront                 | 196                        | 79 %        | 6                          | 67 %        | 118                        | 60 %*       | 9                          | 36 %        |
|                               | Later or never operated          | 51                         | 21 %        | 3                          | 33 %        | 79                         | 40 %        | 16                         | 64 %*       |
| Adjuvant therapy              | No adjuvant                      | 177                        | 72 %        | 6                          | 67 %        | 161                        | 82 %        | 21                         | 84 %        |
|                               | Fluoropyrimidine                 | 27                         | 11 %        | 1                          | 11 %        | 18                         | 9 %         | 2                          | 8 %         |
|                               | Oxaliplatin-based                | 43                         | 17 %        | 2                          | 22 %        | 18                         | 9 %         | 2                          | 8 %         |
| Radiotherapy for primary      | No                               | 208                        | 84 %        | 7                          | 78 %        | 172                        | 87 %        | 21                         | 84 %        |
|                               | Preop 5x5Gy                      | 22                         | 9 %         | 1                          | 11 %        | 5                          | 3 %         | 1                          | 4 %         |
|                               | Chemoradiation                   | 13                         | 5 %         | 1                          | 11 %        | 17                         | 9 %         | 1                          | 4 %         |
|                               | Palliative                       | 4                          | 2 %         | 0                          | 0 %         | 3                          | 2 %         | 2                          | 8 %*        |
| Metastatic sites              | 1 site                           | 195                        | 79 %        | 6                          | 67 %        | 89                         | 45 %        | 10                         | 40 %        |
|                               | 2 sites                          | 43                         | 17 %        | 2                          | 22 %        | 70                         | 36 %        | 8                          | 32 %        |
|                               | 3 to 6 sites                     | 9                          | 4 %         | 1                          | 11 %        | 38                         | 19 %        | 7                          | 28 %        |
| Liver metastases              | No liver metastases              | 46                         | 19 %        | 2                          | 22 %        | 72                         | 37 %        | 5                          | 20 %        |
|                               | Liver metastases                 | 201                        | 81 %        | 7                          | 78 %        | 125                        | 64 %        | 20                         | 80 %        |
| Lung metastases               | No lung metastases               | 211                        | 85 %        | 8                          | 89 %        | 114                        | 58 %        | 15                         | 60 %        |
|                               | Lung metastases                  | 36                         | 15 %        | 1                          | 11 %        | 83                         | 42 %        | 10                         | 40 %        |
| Peritoneal metastases         | No peritoneal metastases         | 226                        | 92 %        | 8                          | 89 %        | 160                        | 81 %        | 20                         | 80 %        |
|                               | Peritoneal metastases            | 21                         | 9 %         | 1                          | 11 %        | 37                         | 19 %        | 5                          | 20 %        |
| Distant lymph node metastases | No distant lymph node metastases | 230                        | 93 %        | 9                          | 100 %       | 119                        | 60 %        | 16                         | 64 %        |
|                               | Distant lymph node metastases    | 17                         | 7 %         | 0                          | 0 %         | 78                         | 40 %        | 9                          | 36 %        |
| Other metastases              | No other metastases              | 222                        | 90 %*       | 6                          | 67 %        | 169                        | 86 %        | 22                         | 88 %        |
|                               | Other metastases                 | 25                         | 10 %        | 3                          | 33 %*       | 28                         | 14 %        | 3                          | 12 %        |
| Molecular status              | <i>RAS/BRAF</i> wildtype         | 94                         | 43 %        | 4                          | 50 %        | 59                         | 32 %        | 5                          | 21 %        |
|                               | <i>KRAS/NRAS</i> mutant          | 120                        | 54 %        | 3                          | 38 %        | 102                        | 56 %        | 13                         | 54 %        |
|                               | <i>BRAF</i> mutant               | 7                          | 3 %         | 1                          | 13 %        | 22                         | 12 %        | 6                          | 25 %        |

§ early metachronous = 2-12 months from diagnosis of metastatic disease, late metachronous = more than 12 months from diagnosis. Abbreviations: LAT = Local Ablative Therapy, HRQoL = Health-Related Quality of Life, ECOG PS = Eastern Cooperative Oncology Group Performance Status, BMI = Body Mass Index. *KRAS* = Kirsten rat sarcoma viral oncogene homolog, *NRAS* = Neuroblastoma rat sarcoma viral oncogene homolog, *BRAF* = v-raf murine sarcoma viral oncogene homolog B1. Statistical differences denoted with \*

Table S3. Patient demographics in the different treatment phases

|                                 |                       | Neoadjuvant<br>n= 54 |         | Post-resection<br>n=59 |         | Rehabilitation<br>n=62 |         | Remission<br>n= 112 |         | Treatment<br>break<br>n= 87 |         | First-line<br>n=169 |         | Second-line<br>n=116 |         | Later-line<br>n= 106 |         | BSC<br>n=35 |         |
|---------------------------------|-----------------------|----------------------|---------|------------------------|---------|------------------------|---------|---------------------|---------|-----------------------------|---------|---------------------|---------|----------------------|---------|----------------------|---------|-------------|---------|
| Age                             | Median (range)        | 62.9                 | (25-82) | 64.3                   | (42-77) | 66                     | (42-80) | 64.7                | (33-80) | 64.6                        | (44-88) | 65.9                | (24-88) | 63.9                 | (24-85) | 64.2                 | (25-81) | 73          | (38-84) |
|                                 | ≤70                   | 43                   | 80 %    | 44                     | 75 %    | 45                     | 73 %    | 99                  | 75 %    | 64                          | 74 %    | 121                 | 72 %    | 87                   | 75 %    | 79                   | 75 %    | 13          | 37 %    |
|                                 | >70                   | 11                   | 20 %    | 15                     | 25 %    | 17                     | 27 %    | 33                  | 25 %    | 23                          | 26 %    | 48                  | 28 %    | 29                   | 25 %    | 27                   | 26 %    | 22          | 63 %    |
| Sex                             | Male                  | 34                   | 63 %    | 35                     | 59 %    | 39                     | 63 %    | 78                  | 59 %    | 58                          | 67 %    | 96                  | 57 %    | 65                   | 56 %    | 63                   | 59 %    | 16          | 46 %    |
|                                 | Female                | 20                   | 37 %    | 24                     | 41 %    | 23                     | 37 %    | 54                  | 41 %    | 29                          | 33 %    | 73                  | 43 %    | 51                   | 44 %    | 43                   | 41 %    | 19          | 54 %    |
| ECOG                            | PS 0                  | 22                   | 41 %    | 24                     | 41 %    | 35                     | 57 %    | 65                  | 49 %    | 38                          | 44 %    | 50                  | 30 %    | 44                   | 38 %    | 46                   | 43 %    | 5           | 14 %    |
|                                 | PS1                   | 31                   | 57 %    | 31                     | 53 %    | 27                     | 44 %    | 62                  | 47 %    | 44                          | 51 %    | 97                  | 57 %    | 64                   | 55 %    | 53                   | 50 %    | 26          | 74 %    |
|                                 | PS 2-3                | 1                    | 2 %     | 4                      | 7 %     | 0                      | 0 %     | 5                   | 4 %     | 5                           | 6 %     | 22                  | 13 %    | 8                    | 7 %     | 7                    | 7 %     | 4           | 11 %    |
| Charlson comor-<br>bidity index | 0                     | 45                   | 83 %    | 48                     | 81 %    | 54                     | 87 %    | 112                 | 85 %    | 71                          | 82 %    | 140                 | 83 %    | 96                   | 83 %    | 85                   | 80 %    | 21          | 60 %    |
|                                 | 1 to 2                | 9                    | 17 %    | 10                     | 17 %    | 8                      | 13 %    | 20                  | 15 %    | 15                          | 17 %    | 28                  | 17 %    | 20                   | 17 %    | 21                   | 20 %    | 13          | 37 %    |
|                                 | 3 to 5                | 0                    | 0 %     | 1                      | 2 %     | 0                      | 0 %     | 0                   | 0 %     | 1                           | 1 %     | 1                   | 1 %     | 0                    | 0 %     | 0                    | 0 %     | 1           | 3 %     |
| Smoking                         | No                    | 31                   | 89 %    | 37                     | 95 %    | 48                     | 94 %    | 84                  | 92 %    | 62                          | 86 %    | 111                 | 84 %    | 80                   | 92 %    | 71                   | 83 %    | 22          | 92 %    |
|                                 | Yes                   | 4                    | 11 %    | 2                      | 5 %     | 3                      | 6 %     | 7                   | 8 %     | 10                          | 14 %    | 22                  | 17 %    | 7                    | 8 %     | 15                   | 17 %    | 2           | 8 %     |
| BMI                             | ≥20                   | 50                   | 93 %    | 56                     | 95 %    | 60                     | 97 %    | 123                 | 93 %    | 82                          | 94 %    | 153                 | 91 %    | 108                  | 93 %    | 100                  | 94 %    | 33          | 94 %    |
|                                 | <20                   | 4                    | 7 %     | 3                      | 5 %     | 2                      | 3 %     | 9                   | 7 %     | 5                           | 6 %     | 16                  | 10 %    | 8                    | 7 %     | 6                    | 6 %     | 2           | 6 %     |
| Presentation§                   | Synchronous           | 37                   | 69 %    | 40                     | 68 %    | 36                     | 58 %    | 78                  | 59 %    | 59                          | 68 %    | 128                 | 76 %    | 85                   | 73 %    | 74                   | 70 %    | 22          | 63 %    |
|                                 | Early metachronous    | 6                    | 11 %    | 4                      | 7 %     | 5                      | 8 %     | 12                  | 9 %     | 4                           | 5 %     | 12                  | 7 %     | 8                    | 7 %     | 13                   | 12 %    | 3           | 9 %     |
|                                 | Late metachronous     | 11                   | 20 %    | 15                     | 25 %    | 21                     | 34 %    | 42                  | 32 %    | 24                          | 28 %    | 29                  | 17 %    | 23                   | 20 %    | 19                   | 18 %    | 10          | 29 %    |
| Primary tumour                  | Right colon           | 11                   | 20 %    | 11                     | 19 %    | 17                     | 27 %    | 25                  | 19 %    | 21                          | 24 %    | 52                  | 31 %    | 32                   | 28 %    | 19                   | 18 %    | 7           | 20 %    |
|                                 | Left colon            | 31                   | 57 %    | 28                     | 48 %    | 30                     | 48 %    | 65                  | 49 %    | 31                          | 36 %    | 59                  | 35 %    | 44                   | 38 %    | 47                   | 44 %    | 15          | 43 %    |
|                                 | Rectum                | 12                   | 22 %    | 20                     | 34 %    | 15                     | 24 %    | 42                  | 32 %    | 35                          | 40 %    | 58                  | 34 %    | 40                   | 35 %    | 40                   | 38 %    | 12          | 34 %    |
|                                 | Multiple              | 0                    | 0 %     | 0                      | 0 %     | 0                      | 0 %     | 0                   | 0 %     | 0                           | 0 %     | 0                   | 0 %     | 0                    | 0 %     | 0                    | 0 %     | 1           | 3 %     |
| Surgery primary<br>tumour       | Operated upfront      | 45                   | 83 %    | 44                     | 75 %    | 51                     | 82 %    | 113                 | 86 %    | 60                          | 69 %    | 100                 | 59 %    | 74                   | 64 %    | 69                   | 65 %    | 25          | 71 %    |
|                                 | Not operated or later | 9                    | 17 %    | 15                     | 25 %    | 11                     | 18 %    | 19                  | 14 %    | 27                          | 31 %    | 69                  | 41 %    | 42                   | 36 %    | 37                   | 35 %    | 10          | 29 %    |
| Prior adjuvant<br>therapy       | No adjuvant           | 40                   | 74 %    | 43                     | 73 %    | 43                     | 69 %    | 92                  | 70 %    | 64                          | 74 %    | 140                 | 83 %    | 95                   | 82 %    | 86                   | 81 %    | 23          | 66 %    |
|                                 | Fluoropyrimidine      | 6                    | 11 %    | 9                      | 15 %    | 8                      | 13 %    | 14                  | 11 %    | 7                           | 8 %     | 10                  | 6 %     | 13                   | 11 %    | 12                   | 11 %    | 7           | 20 %    |
|                                 | Oxaliplatin-based     | 8                    | 15 %    | 7                      | 12 %    | 11                     | 18 %    | 26                  | 20 %    | 16                          | 18 %    | 19                  | 11 %    | 8                    | 7 %     | 8                    | 8 %     | 5           | 14 %    |
| Radiotherapy<br>for rectal      | No                    | 49                   | 91 %    | 48                     | 81 %    | 53                     | 86 %    | 111                 | 84 %    | 77                          | 89 %    | 150                 | 89 %    | 102                  | 88 %    | 89                   | 84 %    | 26          | 74 %    |
|                                 | Preop 5x5Gy           | 3                    | 6 %     | 5                      | 9 %     | 6                      | 10 %    | 13                  | 10 %    | 4                           | 5 %     | 5                   | 3 %     | 6                    | 5 %     | 7                    | 7 %     | 4           | 11 %    |
|                                 | Chemoradiation        | 1                    | 2 %     | 4                      | 7 %     | 2                      | 3 %     | 6                   | 5 %     | 4                           | 5 %     | 12                  | 7 %     | 7                    | 6 %     | 10                   | 9 %     | 5           | 14 %    |
|                                 | Palliative            | 1                    | 2 %     | 2                      | 3 %     | 1                      | 2 %     | 2                   | 2 %     | 2                           | 2 %     | 2                   | 1 %     | 1                    | 1 %     | 0                    | 0 %     | 0           | 0 %     |
| Metastatic sites                | 1                     | 39                   | 72 %    | 45                     | 76 %    | 53                     | 86 %    | 114                 | 86 %    | 49                          | 56 %    | 75                  | 44 %    | 61                   | 53 %    | 67                   | 63 %    | 18          | 51 %    |
|                                 | 2                     | 12                   | 22 %    | 10                     | 17 %    | 7                      | 11 %    | 16                  | 12 %    | 30                          | 35 %    | 60                  | 36 %    | 37                   | 32 %    | 28                   | 26 %    | 10          | 29 %    |
|                                 | 3 to 6                | 3                    | 6 %     | 4                      | 7 %     | 2                      | 3 %     | 2                   | 2 %     | 8                           | 9 %     | 34                  | 20 %    | 18                   | 16 %    | 11                   | 10 %    | 7           | 20 %    |
|                                 | Liver                 | 47                   | 87 %    | 48                     | 81 %    | 49                     | 79 %    | 108                 | 82 %    | 63                          | 72 %    | 116                 | 69 %    | 78                   | 67 %    | 79                   | 75 %    | 23          | 66 %    |
|                                 | Lung                  | 7                    | 13 %    | 9                      | 15 %    | 5                      | 8 %     | 14                  | 11 %    | 26                          | 30 %    | 68                  | 40 %    | 37                   | 32 %    | 34                   | 32 %    | 17          | 49 %    |
|                                 | Peritoneal            | 4                    | 7 %     | 6                      | 10 %    | 8                      | 13 %    | 11                  | 8 %     | 8                           | 9 %     | 34                  | 20 %    | 24                   | 21 %    | 12                   | 11 %    | 4           | 11 %    |
|                                 | Distant lymph nodes   | 6                    | 11 %    | 5                      | 9 %     | 6                      | 10 %    | 8                   | 6 %     | 26                          | 30 %    | 60                  | 36 %    | 38                   | 33 %    | 21                   | 20 %    | 8           | 23 %    |
|                                 | Other                 | 5                    | 9 %     | 6                      | 10 %    | 4                      | 7 %     | 8                   | 6 %     | 8                           | 9 %     | 26                  | 15 %    | 15                   | 13 %    | 10                   | 9 %     | 6           | 17 %    |
| Molecular<br>status             | RAS/BRAF wt           | 27                   | 50 %    | 29                     | 50 %    | 28                     | 46 %    | 52                  | 48 %    | 32                          | 37 %    | 54                  | 34 %    | 33                   | 30 %    | 32                   | 32 %    | 14          | 42 %    |
|                                 | KRAS/NRAS mt          | 24                   | 44 %    | 27                     | 47 %    | 29                     | 48 %    | 53                  | 49 %    | 49                          | 57 %    | 85                  | 53 %    | 67                   | 61 %    | 62                   | 63 %    | 17          | 52 %    |
|                                 | BRAF mt               | 3                    | 6 %     | 2                      | 3 %     | 4                      | 7 %     | 3                   | 3 %     | 5                           | 6 %     | 22                  | 14 %    | 10                   | 9 %     | 5                    | 5 %     | 2           | 6 %     |
|                                 | BRAF wt tested        | 40                   | 93 %    | 47                     | 96 %    | 45                     | 92 %    | 76                  | 96 %    | 67                          | 93 %    | 115                 | 84 %    | 81                   | 89 %    | 62                   | 93 %    | 21          | 91 %    |
|                                 | BRAF mt tested        | 3                    | 7 %     | 2                      | 4 %     | 4                      | 8 %     | 3                   | 4 %     | 5                           | 7 %     | 22                  | 16 %    | 10                   | 11 %    | 5                    | 8 %     | 2           | 9 %     |

§ early metachronous = 2-12 months from diagnosis of metastatic disease, late metachronous = more than 12 months from diagnosis. Abbreviations: BSC = Best Supportive Care, ECOG PS = Eastern Cooperative Oncology Group Performance Status, BMI = Body Mass Index. KRAS = Kirsten rat sarcoma viral oncogene homolog, NRAS = Neuroblastoma rat sarcoma viral oncogene homolog, BRAF = v-raf murine sarcoma viral oncogene homolog B1.



Table S4. Association of demographic factors and index scores during remission phase

|                         |                                     | n   | 15D score |       |   | P-value | EQ-5D score |       |   | P-value | VAS score |      |   | P-value | QLQ-C30 GHS |      |  | P-value |
|-------------------------|-------------------------------------|-----|-----------|-------|---|---------|-------------|-------|---|---------|-----------|------|---|---------|-------------|------|--|---------|
|                         |                                     |     | Mean      | SD    |   |         | Mean        | SD    |   |         | Mean      | SD   |   |         | Mean        | SD   |  |         |
| Age                     | ≤70                                 | 99  | 0.897     | 0.094 |   |         | 0.881       | 0.142 |   |         | 79.1      | 14.8 |   |         | 77.5        | 16.8 |  |         |
|                         | >70                                 | 33  | 0.888     | 0.087 |   |         | 0.849       | 0.127 |   |         | 74.1      | 15.2 |   |         | 69.3        | 23.3 |  | *       |
| Sex                     | Male                                | 78  | 0.889     | 0.091 |   |         | 0.874       | 0.143 |   |         | 77.2      | 15.2 |   |         | 74.2        | 20.3 |  |         |
|                         | Female                              | 54  | 0.903     | 0.095 |   |         | 0.872       | 0.133 |   |         | 78.7      | 14.8 |   |         | 77.3        | 16.5 |  |         |
| ECOG                    | PS 0                                | 65  | 0.924     | 0.069 |   |         | 0.911       | 0.132 |   |         | 79.8      | 13.8 |   |         | 77.7        | 19.5 |  |         |
|                         | PS 1                                | 62  | 0.875     | 0.089 | * |         | 0.842       | 0.137 |   |         | 76.4      | 16.1 |   |         | 73.6        | 18.3 |  |         |
|                         | PS 2-3                              | 5   | 0.759     | 0.194 | * |         | 0.794       | 0.138 | * |         | 70.4      | 10.9 |   |         | 71.9        | 15.0 |  |         |
| Charlson index          | 0                                   | 112 | 0.901     | 0.093 |   |         | 0.883       | 0.134 |   |         | 79.0      | 14.6 |   |         | 77.8        | 17.0 |  |         |
|                         | 1 to 5                              | 20  | 0.861     | 0.083 |   |         | 0.818       | 0.154 |   |         | 72.0      | 15.8 |   |         | 62.8        | 23.3 |  | *       |
| Number of comorbidities | No                                  | 43  | 0.938     | 0.054 |   |         | 0.924       | 0.122 |   |         | 83.5      | 11.4 |   |         | 81.6        | 14.4 |  |         |
|                         | 1 to 3                              | 80  | 0.881     | 0.098 | * |         | 0.853       | 0.135 | * |         | 75.5      | 16.0 | * |         | 73.3        | 19.7 |  | *       |
|                         | 4 to 12                             | 9   | 0.814     | 0.094 | * |         | 0.804       | 0.180 | * |         | 71.2      | 13.6 | * |         | 65.2        | 22.6 |  | *       |
| Number of regular drugs | 0-3                                 | 90  | 0.911     | 0.077 |   |         | 0.880       | 0.137 |   |         | 79.7      | 13.7 |   |         | 77.9        | 17.9 |  |         |
|                         | 4-12                                | 42  | 0.859     | 0.112 | * |         | 0.860       | 0.143 |   |         | 73.9      | 16.9 | * |         | 70.4        | 19.8 |  | *       |
| BMI                     | <20                                 | 9   | 0.901     | 0.169 |   |         | 0.934       | 0.123 |   |         | 86.2      | 10.7 |   |         | 87.1        | 11.1 |  |         |
|                         | 20-30                               | 99  | 0.907     | 0.081 |   |         | 0.889       | 0.133 | * |         | 79.3      | 14.1 | * |         | 77.6        | 17.6 |  | *       |
|                         | >30                                 | 24  | 0.844     | 0.083 | * |         | 0.782       | 0.133 | * |         | 68.9      | 16.4 | * |         | 62.4        | 20.1 |  | *       |
| Smoking                 | Never                               | 56  | 0.894     | 0.084 |   |         | 0.863       | 0.141 |   |         | 77.0      | 14.4 |   |         | 73.9        | 20.9 |  |         |
|                         | Ex-smoker                           | 28  | 0.879     | 0.124 |   |         | 0.868       | 0.137 |   |         | 78.3      | 16.5 |   |         | 73.4        | 17.5 |  |         |
|                         | Smoker                              | 7   | 0.929     | 0.047 |   |         | 0.953       | 0.056 |   |         | 79.8      | 8.9  |   |         | 78.5        | 9.6  |  |         |
| Presentation            | Synchronous                         | 78  | 0.901     | 0.088 |   |         | 0.882       | 0.132 |   |         | 79.3      | 14.5 |   |         | 77.4        | 16.6 |  |         |
|                         | Metachronous                        | 54  | 0.886     | 0.098 |   |         | 0.862       | 0.149 |   |         | 75.8      | 15.5 |   |         | 72.7        | 21.5 |  |         |
| Primary tumour          | Right colon                         | 25  | 0.903     | 0.088 |   |         | 0.852       | 0.142 |   |         | 74.0      | 16.9 |   |         | 74.7        | 17.7 |  |         |
|                         | Left colon                          | 65  | 0.901     | 0.079 |   |         | 0.878       | 0.140 |   |         | 79.1      | 15.0 |   |         | 75.3        | 20.4 |  |         |
|                         | Rectum                              | 42  | 0.882     | 0.112 |   |         | 0.878       | 0.136 |   |         | 78.1      | 13.7 |   |         | 76.2        | 17.3 |  |         |
| TNM stage               | I                                   | 11  | 0.879     | 0.079 |   |         | 0.879       | 0.123 |   |         | 77.0      | 13.6 |   |         | 70.0        | 26.4 |  |         |
|                         | II                                  | 22  | 0.903     | 0.076 |   |         | 0.864       | 0.156 |   |         | 75.7      | 17.5 |   |         | 74.9        | 19.7 |  |         |
|                         | III                                 | 33  | 0.889     | 0.107 |   |         | 0.871       | 0.144 |   |         | 76.2      | 14.2 |   |         | 74.3        | 16.5 |  |         |
|                         | IV                                  | 66  | 0.898     | 0.092 |   |         | 0.877       | 0.135 |   |         | 79.6      | 14.8 |   |         | 77.3        | 18.4 |  |         |
| Molecular status        | <i>RAS</i> +/- <i>BRAF</i> wildtype | 65  | 0.881     | 0.105 |   |         | 0.864       | 0.141 |   |         | 75.9      | 16.2 |   |         | 71.8        | 20.4 |  |         |
|                         | <i>RAS</i> mutation                 | 53  | 0.900     | 0.079 |   |         | 0.871       | 0.142 |   |         | 79.5      | 12.3 | * |         | 77.1        | 16.8 |  |         |
|                         | <i>BRAF</i> mutation                | 3   | 0.926     | 0.076 |   |         | 0.879       | 0.209 |   |         | 61.6      | 27.5 |   |         | 80.6        | 19.2 |  |         |
| Mismatch repair status  | proficient MMR                      | 39  | 0.874     | 0.117 |   |         | 0.884       | 0.153 |   |         | 76.4      | 15.7 |   |         | 73.0        | 22.9 |  |         |
|                         | deficient MMR                       | 3   | 0.880     | 0.043 |   |         | 0.791       | 0.143 |   |         | 63.4      | 25.9 |   |         | 66.2        | 17.4 |  |         |
|                         | Not tested                          | 90  | 0.905     | 0.080 |   |         | 0.872       | 0.132 |   |         | 79.0      | 14.1 |   |         | 76.9        | 16.8 |  |         |
| Primary surgery         | Abdominoperineal resection          | 7   | 0.877     | 0.122 |   |         | 0.869       | 0.130 |   |         | 77.1      | 22.2 |   |         | 72.4        | 26.6 |  |         |
|                         | Anterior resection                  | 21  | 0.890     | 0.090 |   |         | 0.872       | 0.142 |   |         | 79.9      | 12.9 |   |         | 77.9        | 17.6 |  |         |
|                         | Anterior resection (stoma)          | 16  | 0.883     | 0.138 |   |         | 0.896       | 0.134 |   |         | 78.9      | 11.6 |   |         | 76.9        | 13.7 |  |         |
|                         | Bowel resection                     | 2   | 0.901     | 0.098 |   |         | 0.898       | 0.144 |   |         | 77.3      | 31.5 |   |         | 80.2        | 19.2 |  |         |
|                         | Colectomy                           | 3   | 0.848     | 0.058 |   |         | 0.598       | 0.112 | * |         | 55.7      | 12.8 | * |         | 50.4        | 15.4 |  | *       |
|                         | Haartman's operation (stoma)        | 1   | 0.747     | .     |   |         | 0.703       | .     |   |         | 50.0      | .    |   |         | 58.3        | .    |  |         |
|                         | Left hemicolectomy                  | 15  | 0.889     | 0.079 |   |         | 0.906       | 0.134 |   |         | 76.7      | 16.5 |   |         | 70.6        | 26.6 |  |         |
|                         | Right hemicolectomy                 | 21  | 0.903     | 0.091 |   |         | 0.847       | 0.148 |   |         | 73.5      | 16.8 |   |         | 74.4        | 18.9 |  |         |
|                         | Sigmaresection                      | 41  | 0.906     | 0.079 |   |         | 0.890       | 0.126 |   |         | 80.7      | 12.6 |   |         | 77.8        | 17.1 |  |         |
|                         | Subtotal colectomy                  | 4   | 0.927     | 0.060 |   |         | 0.880       | 0.120 |   |         | 84.3      | 11.0 |   |         | 83.3        | 7.2  |  |         |
| Surgery primary tumour  | Operated upfront                    | 113 | 0.900     | 0.091 |   |         | 0.878       | 0.137 |   |         | 78.6      | 14.8 |   |         | 76.2        | 18.7 |  |         |
|                         | Not operated or later               | 19  | 0.863     | 0.095 |   |         | 0.846       | 0.151 |   |         | 73.9      | 15.6 |   |         | 71.2        | 19.3 |  |         |
| Adjuvant therapy        | Not given                           | 92  | 0.903     | 0.083 |   |         | 0.876       | 0.140 |   |         | 79.2      | 14.7 |   |         | 75.7        | 19.8 |  |         |
|                         | Fluoropyridine +/- oxaliplatin      | 40  | 0.883     | 0.105 |   |         | 0.869       | 0.137 |   |         | 75.8      | 15.3 |   |         | 75.1        | 17.4 |  |         |
| Radiotherapy            | Preoperative 5x5Gy                  | 13  | 0.833     | 0.139 | * |         | 0.838       | 0.124 | * |         | 70.3      | 9.9  | * |         | 72.0        | 13.4 |  | *       |
|                         | Chemoradiation                      | 6   | 0.949     | 0.064 |   |         | 0.954       | 0.112 |   |         | 88.8      | 5.1  |   |         | 86.3        | 15.8 |  |         |
|                         | Palliative                          | 2   | 0.694     | 0.066 | * |         | 0.682       | 0.013 |   |         | 47.5      | 24.7 | * |         | 35.4        | 8.8  |  | *       |
|                         | No                                  | 111 | 0.903     | 0.080 |   |         | 0.877       | 0.139 |   |         | 78.7      | 14.8 | * |         | 76.0        | 18.7 |  | *       |

Abbreviations: VAS = Visual Analogue Scale, GHS = Global Health Status, ECOG PS = Eastern Cooperative Oncology Group Performance Status, BMI = Body Mass Index.

Table S5. Association of metastatic sites or metastasectomies and index scores during remission phase

|                        |                                | n=  | 15D score |       | P-    | EQ-5D score |       | P-    | VAS  |      | P-    | GHS  |      | P-    |
|------------------------|--------------------------------|-----|-----------|-------|-------|-------------|-------|-------|------|------|-------|------|------|-------|
|                        |                                | 132 | Mean      | SD    | value | Mean        | SD    | value | Mean | SD   | value | Mean | SD   | value |
| Metastatic sites       | 1 site at baseline             | 114 | 0.897     | 0.092 |       | 0.874       | 0.138 |       | 78.5 | 14.1 |       | 75.9 | 18.0 |       |
|                        | 2 sites at baseline            | 16  | 0.880     | 0.096 |       | 0.865       | 0.151 |       | 71.7 | 19.6 |       | 70.8 | 25.0 |       |
|                        | 3 to 6 sites at baseline       | 2   | 0.899     | 0.101 |       | 0.924       | 0.108 |       | 89.5 | 14.1 |       | 88.5 | 7.4  |       |
|                        | 1 site during trajectory       | 90  | 0.896     | 0.096 |       | 0.874       | 0.136 |       | 78.2 | 14.7 |       | 75.6 | 17.4 |       |
|                        | 2 sites during trajectory      | 1   | 0.898     | 0.079 |       | 0.888       | 0.142 |       | 76.9 | 15.1 |       | 75.5 | 22.7 |       |
|                        | 3 to 9 sites during trajectory | 11  | 0.878     | 0.104 |       | 0.829       | 0.152 |       | 77.4 | 18.0 |       | 74.7 | 20.8 |       |
| Liver metastases       | Absent at baseline             | 24  | 0.900     | 0.112 |       | 0.911       | 0.115 |       | 79.1 | 16.7 |       | 84.5 | 11.7 | *     |
|                        | Present at baseline            | 108 | 0.894     | 0.088 |       | 0.866       | 0.142 |       | 77.6 | 14.6 |       | 73.6 | 19.5 |       |
|                        | Absent during trajectory       | 21  | 0.895     | 0.118 |       | 0.911       | 0.114 |       | 79.3 | 17.2 |       | 83.9 | 12.2 | *     |
|                        | Present during trajectory      | 111 | 0.895     | 0.087 |       | 0.867       | 0.142 |       | 77.6 | 14.6 |       | 74.0 | 19.4 |       |
| Lung metastases        | Absent at baseline             | 118 | 0.897     | 0.084 |       | 0.866       | 0.140 |       | 77.6 | 14.8 |       | 75.2 | 17.8 |       |
|                        | Present at baseline            | 14  | 0.880     | 0.149 |       | 0.942       | 0.108 |       | 79.9 | 17.2 |       | 78.3 | 27.2 |       |
|                        | Absent during trajectory       | 100 | 0.896     | 0.084 |       | 0.867       | 0.138 |       | 77.4 | 15.1 |       | 75.0 | 17.3 |       |
|                        | Present during trajectory      | 32  | 0.891     | 0.115 |       | 0.898       | 0.141 |       | 79.4 | 14.8 |       | 76.9 | 23.6 |       |
| Peritoneal metastases  | Absent at baseline             | 121 | 0.893     | 0.094 |       | 0.871       | 0.140 |       | 78.1 | 14.6 |       | 74.9 | 19.3 |       |
|                        | Present at baseline            | 11  | 0.912     | 0.064 |       | 0.904       | 0.127 |       | 74.6 | 19.8 |       | 82.5 | 9.8  |       |
|                        | Absent during trajectory       | 120 | 0.893     | 0.095 |       | 0.872       | 0.140 |       | 78.2 | 14.6 |       | 74.9 | 19.4 |       |
|                        | Present during trajectory      | 12  | 0.911     | 0.061 |       | 0.895       | 0.125 |       | 74.3 | 18.8 |       | 82.1 | 9.4  |       |
| Distant lymph nodes    | Absent at baseline             | 124 | 0.893     | 0.094 |       | 0.873       | 0.140 |       | 77.5 | 15.1 |       | 75.0 | 19.0 |       |
|                        | Present at baseline            | 8   | 0.932     | 0.055 |       | 0.883       | 0.120 |       | 84.2 | 11.5 |       | 84.1 | 12.5 |       |
|                        | Absent during trajectory       | 120 | 0.893     | 0.092 |       | 0.876       | 0.138 |       | 77.5 | 15.0 |       | 75.1 | 18.9 |       |
|                        | Present during trajectory      | 12  | 0.914     | 0.092 |       | 0.848       | 0.144 |       | 81.1 | 14.9 |       | 79.5 | 18.6 |       |
| Other metastatic sites | Absent at baseline             | 124 | 0.898     | 0.092 |       | 0.877       | 0.137 |       | 78.5 | 14.3 |       | 75.6 | 18.9 |       |
|                        | Present at baseline            | 8   | 0.847     | 0.085 |       | 0.828       | 0.161 |       | 68.1 | 21.6 |       | 73.8 | 18.2 |       |
|                        | Absent during trajectory       | 108 | 0.894     | 0.095 |       | 0.875       | 0.139 |       | 77.8 | 14.6 |       | 74.7 | 19.2 |       |
|                        | Present during trajectory      | 24  | 0.899     | 0.082 |       | 0.867       | 0.139 |       | 78.3 | 16.8 |       | 79.0 | 17.0 |       |
| Metastasectomies       | 1                              | 87  | 0.894     | 0.099 |       | 0.861       | 0.147 |       | 77.7 | 15.8 |       | 75.0 | 18.3 |       |
|                        | 2                              | 26  | 0.893     | 0.088 |       | 0.883       | 0.130 |       | 79.8 | 14.4 |       | 73.8 | 23.8 |       |
|                        | 3                              | 13  | 0.909     | 0.072 |       | 0.912       | 0.116 |       | 78.5 | 10.1 |       | 81.4 | 14.6 |       |
|                        | 4                              | 4   | 0.872     | 0.014 |       | 0.931       | 0.063 |       | 66.1 | 12.2 |       | 77.8 | 10.4 |       |
| Liver procedure        | Not done                       | 23  | 0.898     | 0.113 |       | 0.912       | 0.111 |       | 80.1 | 16.5 |       | 84.5 | 11.9 |       |
|                        | Performed                      | 109 | 0.894     | 0.088 |       | 0.866       | 0.143 |       | 77.4 | 14.7 |       | 73.7 | 19.5 | *     |
|                        | 1 procedure                    | 94  | 0.893     | 0.091 |       | 0.862       | 0.148 |       | 77.3 | 15.1 |       | 72.9 | 20.3 |       |
|                        | 2 procedures                   | 12  | 0.904     | 0.067 |       | 0.885       | 0.117 |       | 79.2 | 12.3 |       | 77.9 | 12.9 |       |
|                        | 3 procedures                   | 2   | 0.887     | 0.089 |       | 0.919       | 0.115 |       | 82.4 | 10.8 |       | 87.2 | 14.2 |       |
|                        | 5 procedures                   | 1   | 0.869     | .     |       | 0.850       | .     |       | 58.0 | .    |       | 66.7 | .    |       |
| Lung procedure         | Not done                       | 107 | 0.897     | 0.084 |       | 0.861       | 0.139 |       | 77.6 | 15.0 |       | 75.1 | 17.4 |       |
|                        | Performed                      | 25  | 0.887     | 0.124 |       | 0.928       | 0.123 | *     | 78.8 | 15.1 |       | 77.3 | 24.5 |       |
|                        | 1 procedure                    | 18  | 0.874     | 0.141 |       | 0.913       | 0.139 |       | 76.9 | 17.0 |       | 73.9 | 27.9 |       |
|                        | 2 procedures                   | 6   | 0.927     | 0.063 |       | 0.970       | 0.074 |       | 84.7 | 8.0  |       | 84.3 | 12.0 |       |
|                        | 3 procedures                   | 1   | 0.883     | .     |       | 0.925       | .     |       | 75.5 | .    |       | 91.7 | .    |       |
|                        |                                |     |           |       |       |             |       |       |      |      |       |      |      |       |
| Cytoreductive surgery  | Not done                       | 120 | 0.893     | 0.095 |       | 0.872       | 0.140 |       | 78.2 | 14.6 |       | 74.9 | 19.4 |       |
|                        | Performed                      | 12  | 0.911     | 0.061 |       | 0.895       | 0.125 |       | 74.3 | 18.8 |       | 82.1 | 9.4  |       |
|                        | 1 procedure                    | 7   | 0.902     | 0.069 |       | 0.881       | 0.137 |       | 66.5 | 20.6 |       | 80.9 | 12.0 |       |
|                        | 2 procedures                   | 4   | 0.940     | 0.041 |       | 0.949       | 0.102 |       | 86.5 | 12.3 |       | 84.5 | 6.7  |       |
|                        | 3 procedures                   | 1   | 0.853     | .     |       | 0.761       | .     |       | 73.0 | .    |       | 79.2 | .    |       |
|                        |                                |     |           |       |       |             |       |       |      |      |       |      |      |       |
| Other resections       | Not done                       | 118 | 0.896     | 0.092 |       | 0.877       | 0.137 |       | 78.5 | 14.5 |       | 75.5 | 18.7 |       |
|                        | Performed                      | 14  | 0.885     | 0.096 |       | 0.844       | 0.154 |       | 71.9 | 18.8 |       | 75.6 | 21.2 |       |
|                        | 1 procedure                    | 10  | 0.885     | 0.097 |       | 0.843       | 0.164 |       | 70.4 | 21.1 |       | 77.9 | 21.3 |       |
|                        | 2 procedures                   | 4   | 0.884     | 0.108 |       | 0.848       | 0.155 |       | 76.3 | 11.5 |       | 68.8 | 24.0 |       |

Abbreviations: VAS = Visual Analogue Scale, GHS = Global Health Status.
